# Supplementary material for: Gastric coagulation and postprandial amino acid absorption of milk is affected by mineral composition: a randomized crossover trial
Source: Royal Society of Chemistry journal article supplement (doi:10.1039/d3fo04063a), 2024-01-01
Supplement: d3fo04063a1.pdf [file d3fo04063a1.pdf]

## SUPPLEMENTARY FIGURES

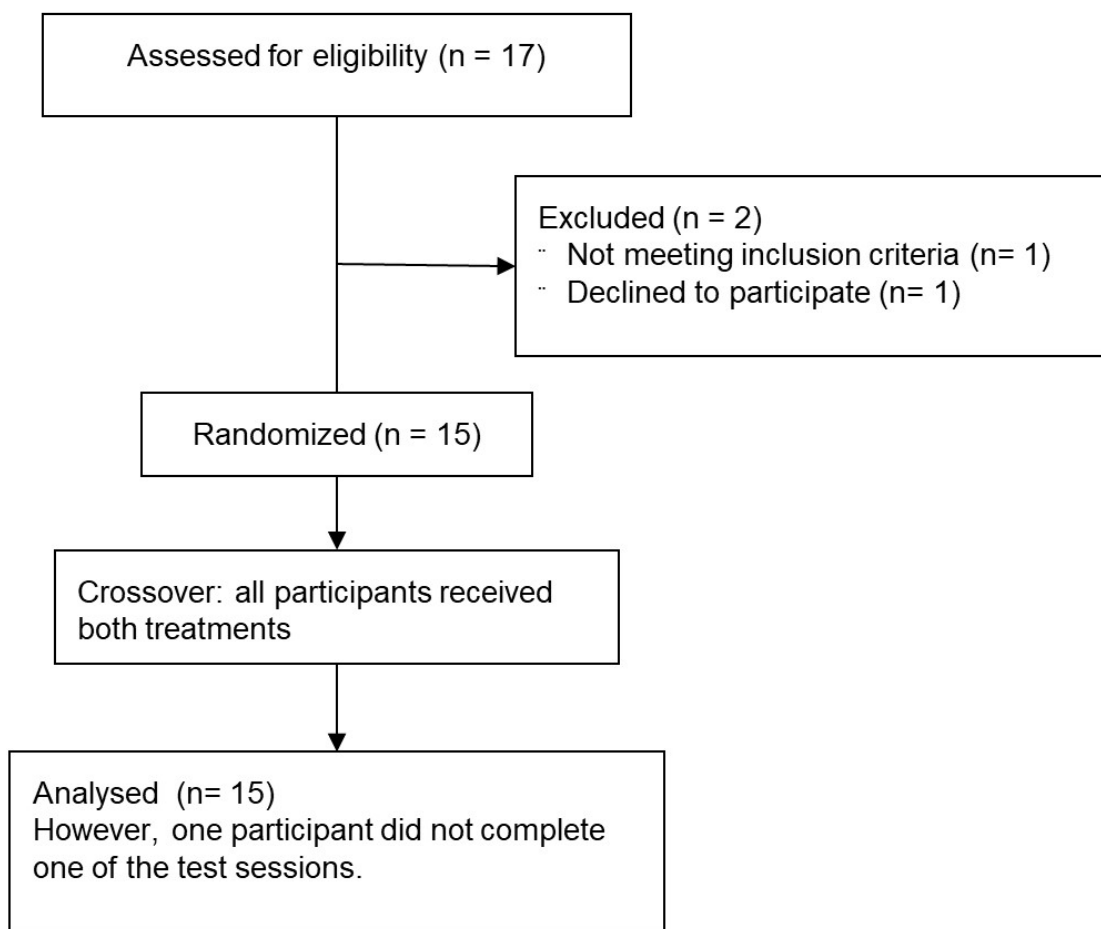

**Supplementary figure 1.** Study flow diagram

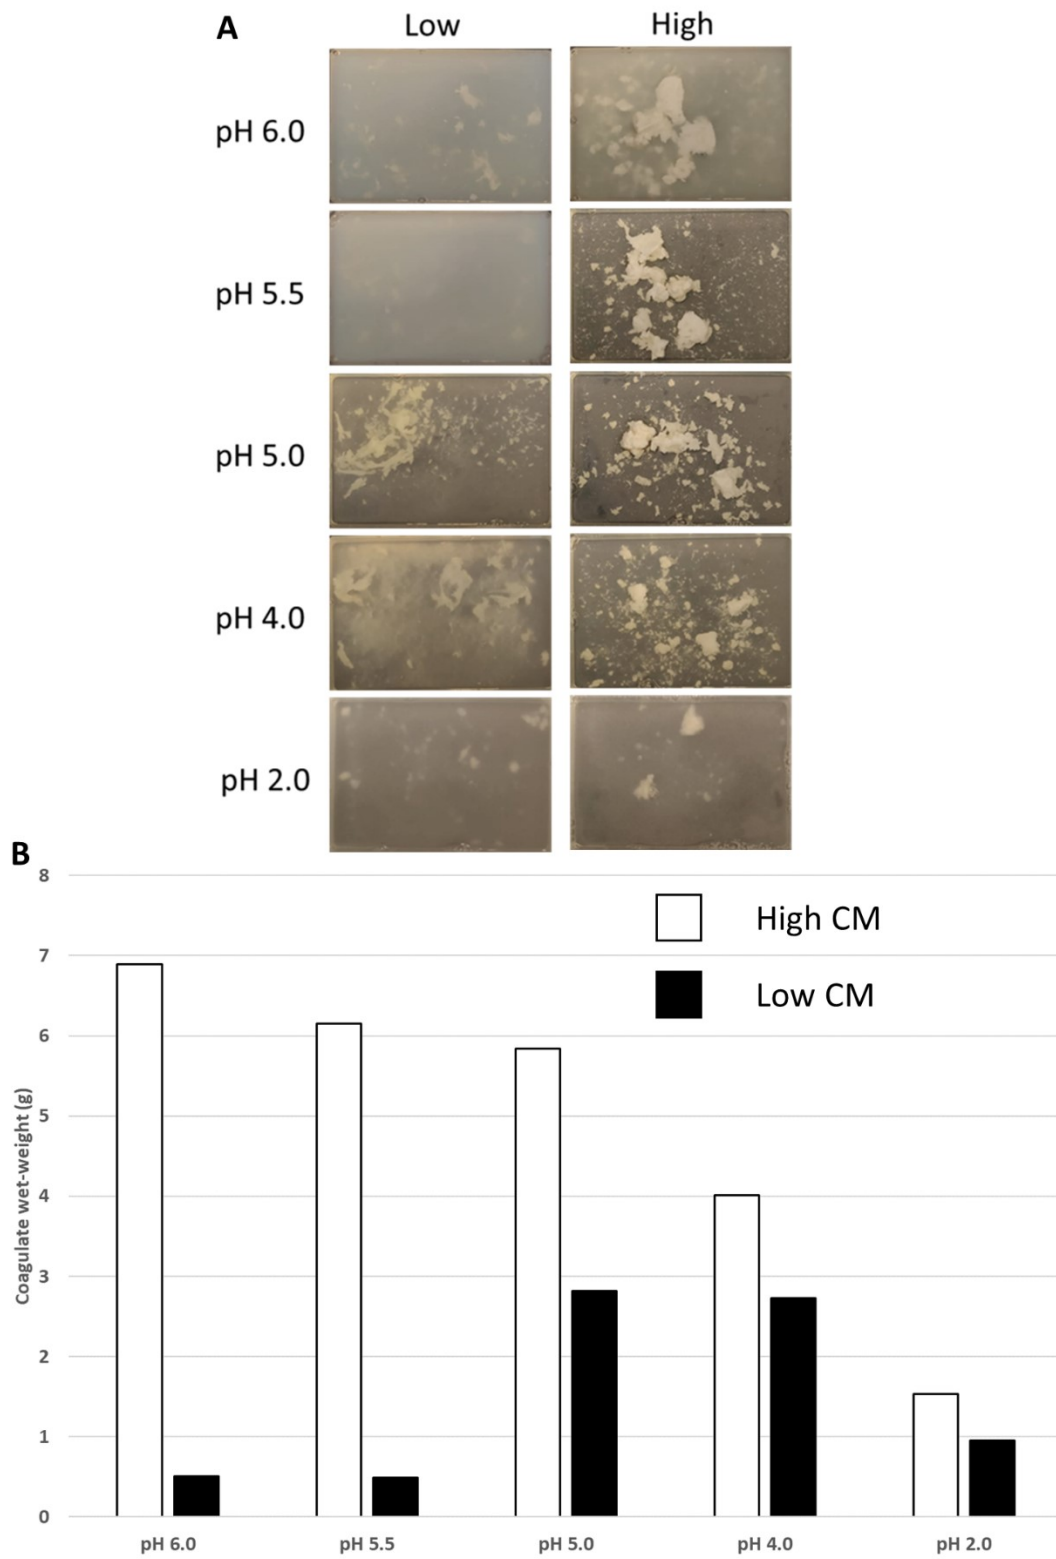

**Supplementary figure 2. Coagulation *in vitro***

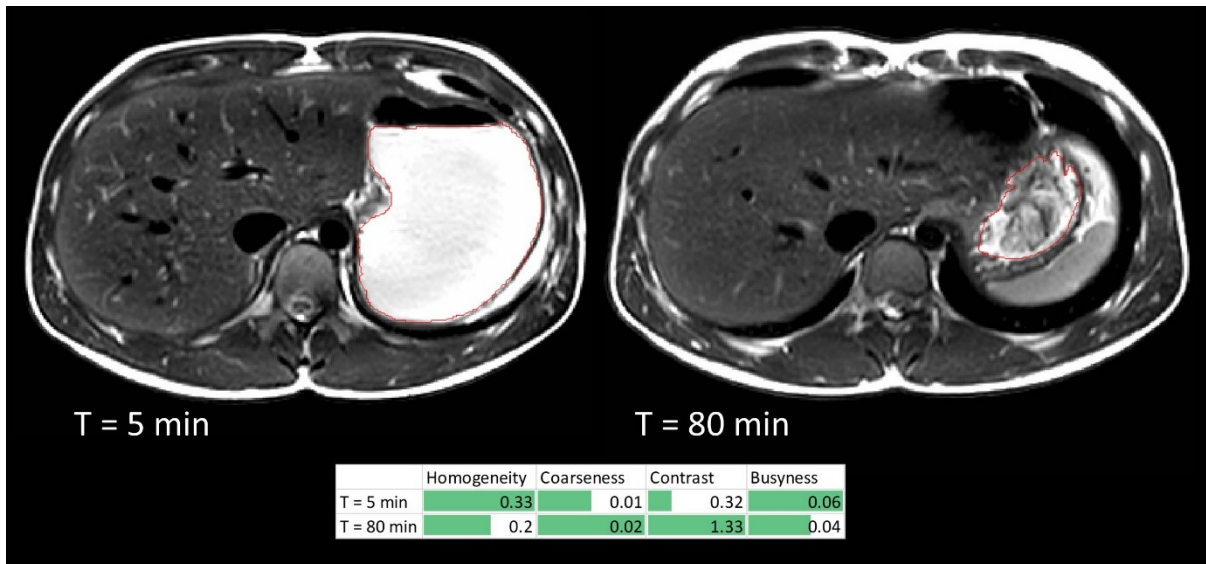

**Supplementary figure 3.** Examples of  $T_2$ -weighted magnetic resonance images showing cross-sections of non-coagulating stomach content at  $T = 5$  minutes and coagulating stomach content at  $T = 80$  minutes and the associated image texture metrics.

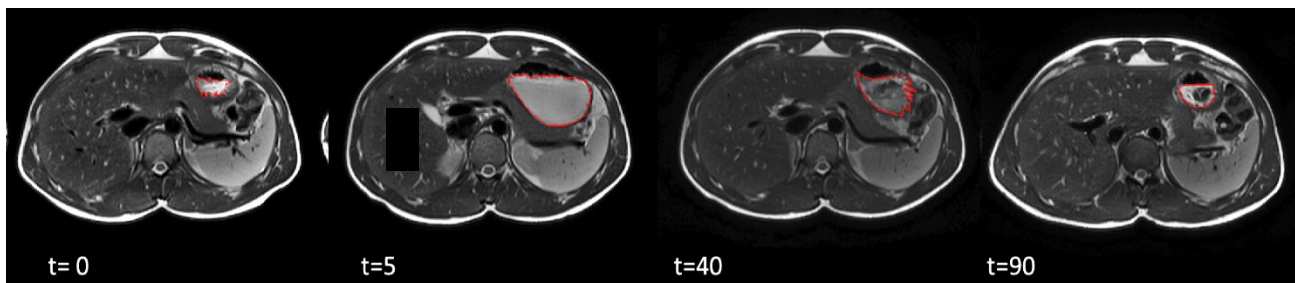

**Supplementary figure 4.** Examples of  $T_2$ -weighted magnetic resonance images showing cross-sections through an empty stomach after an overnight fast (baseline) and after 600 ml skimmed milk consumption. The red line delineates stomach content. At  $T = 40$  and 90 minutes milk protein coagulation can be observed by darker and lighter voxels.

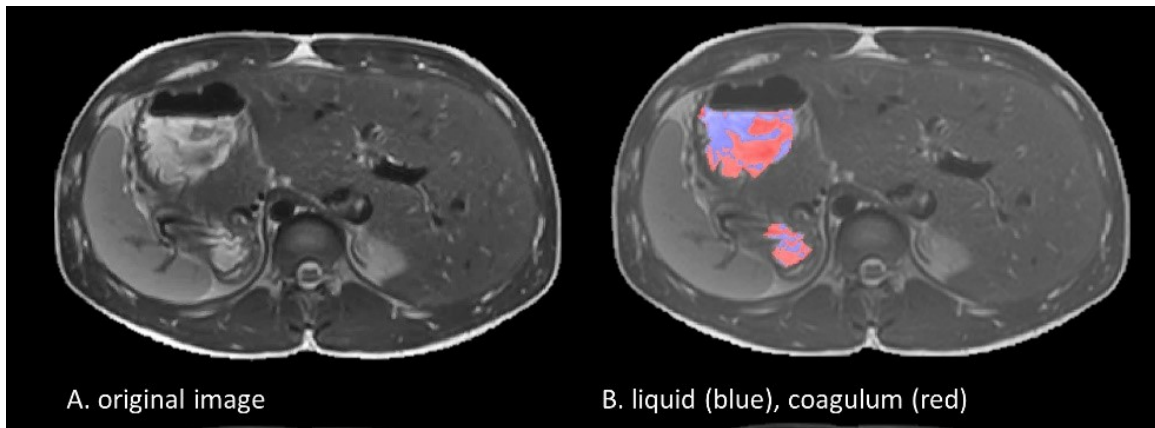

**Supplementary figure 5.** Examples of  $T_2$ -weighted magnetic resonance images showing cross-sections through a stomach at  $T = 60$  min with A showing the original image and B the voxels of stomach content colored: liquid as blue and semi-solid as red after applying the thresholding method.

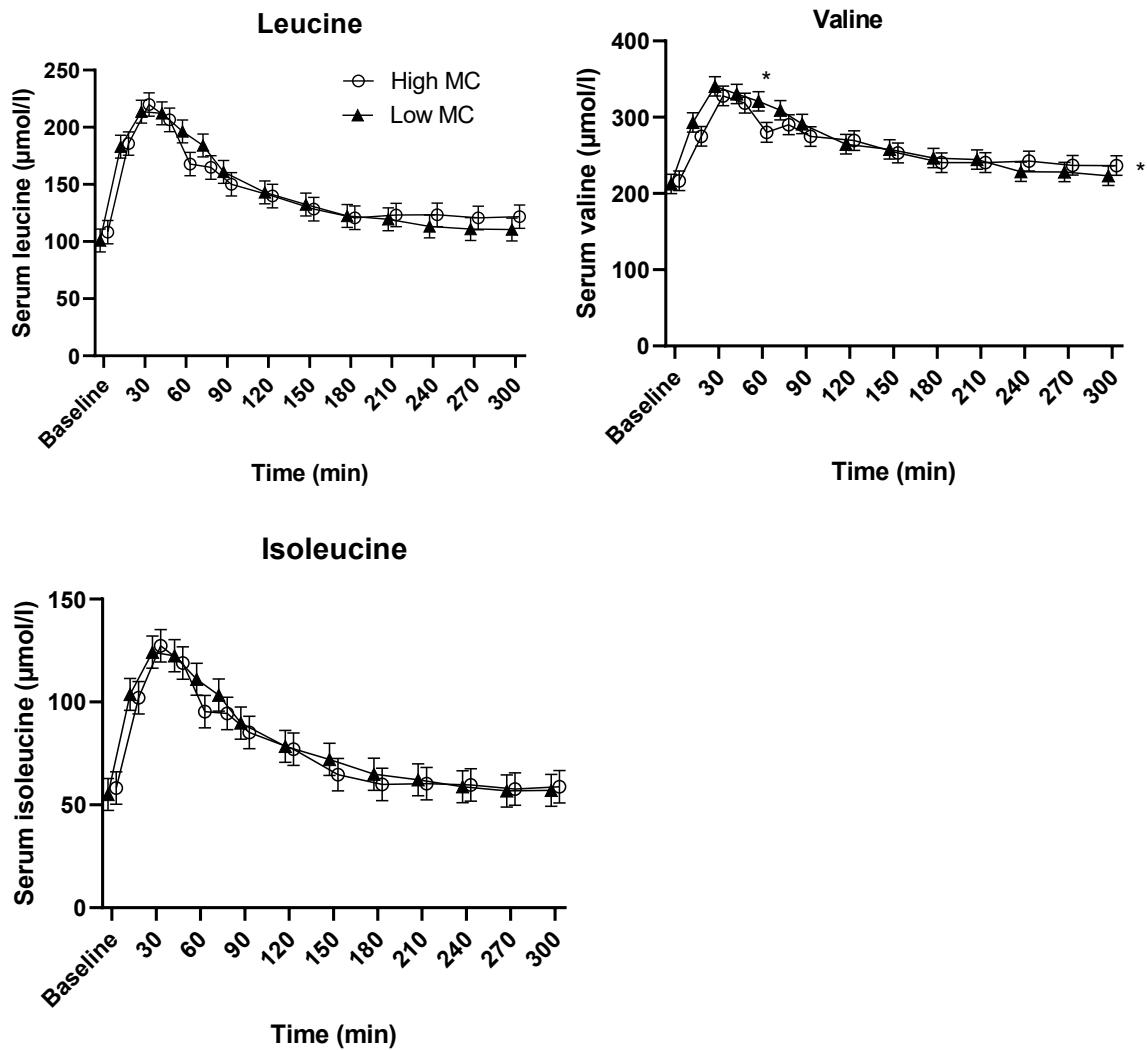

**Supplementary figure 6.** Mean  $\pm$  SEM of serum branch chained amino acids over time (n=15). \*p < 0.05 placed above the value denotes a significant time point, at the right of the graph it denotes a significant treatment effect.

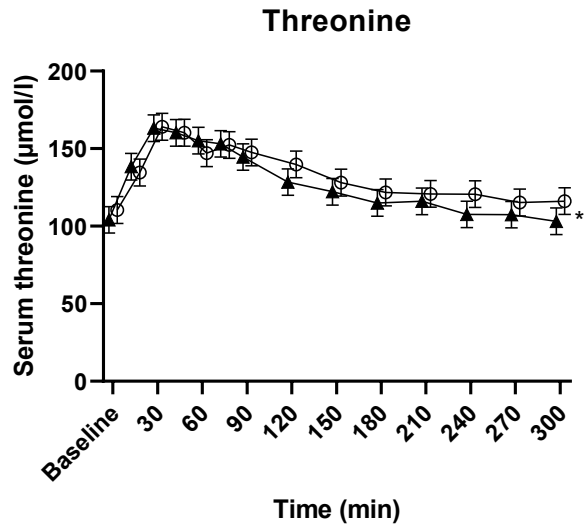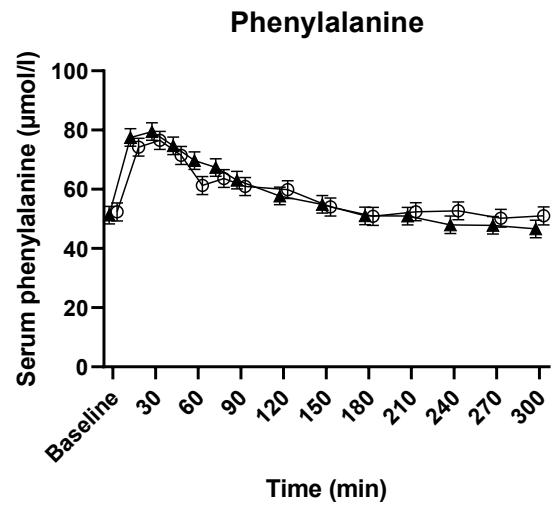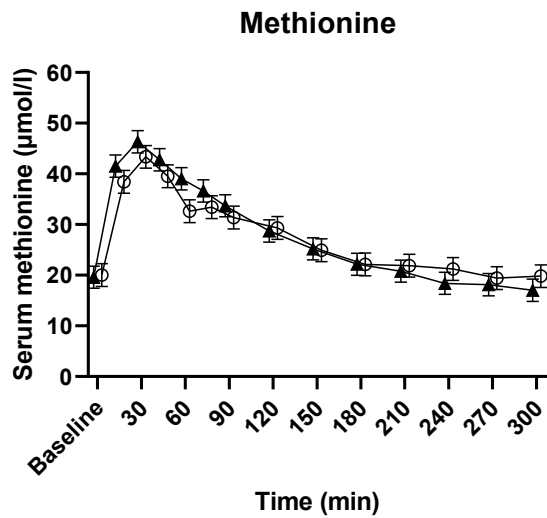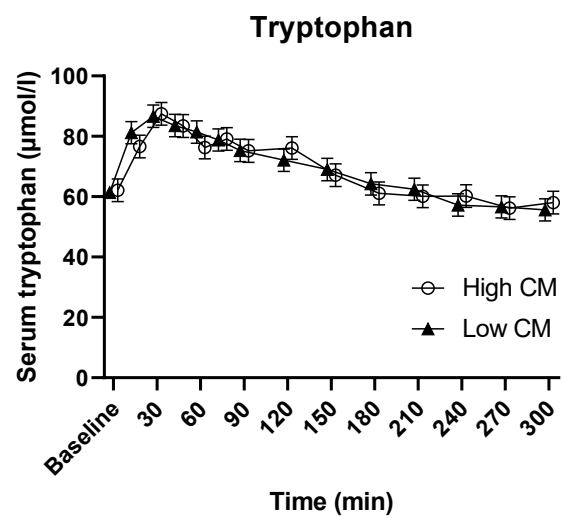

**Supplementary figure 7.** Mean  $\pm$  SEM of serum essential amino acids over time (n=15). \*p < 0.05 placed above the value denotes a significant time point, at the right of the graph it denotes a significant treatment effect.

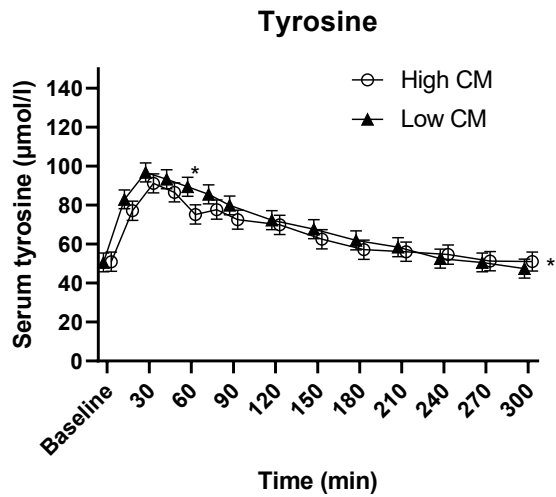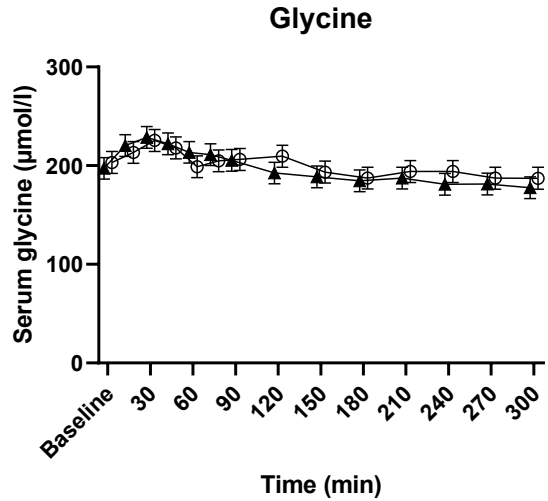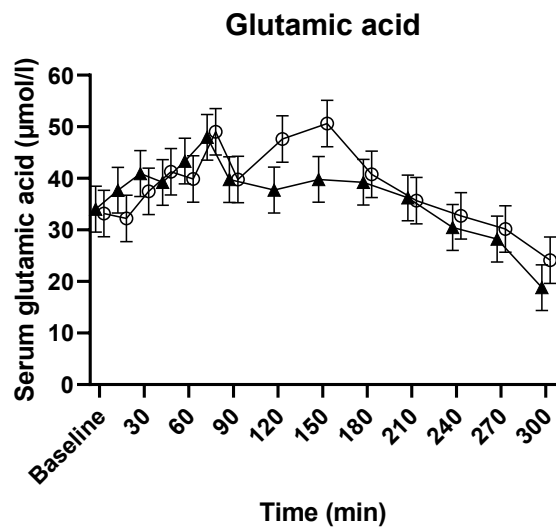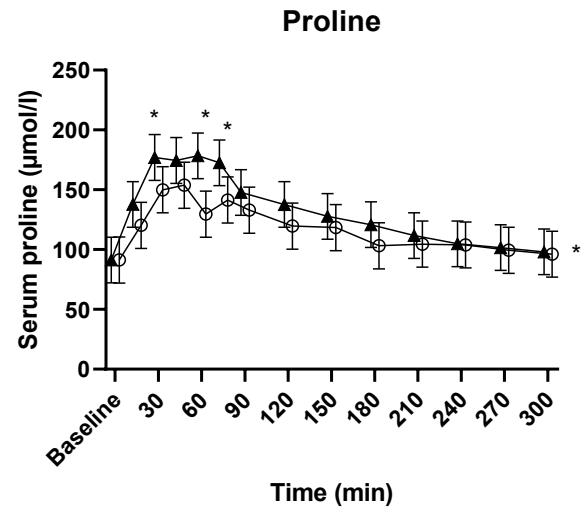

**Supplementary figure 8.** Mean  $\pm$  SEM of serum non-essential or conditionally essential amino acids over time (n = 15). \*p < 0.05 placed above the value denotes a significant time point, at the right of the graph it denotes a significant treatment effect.

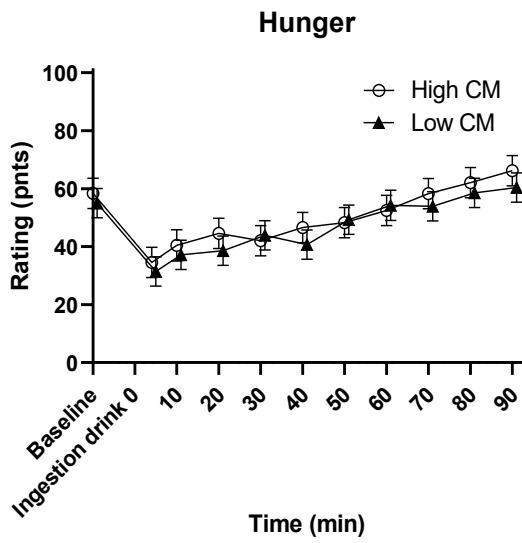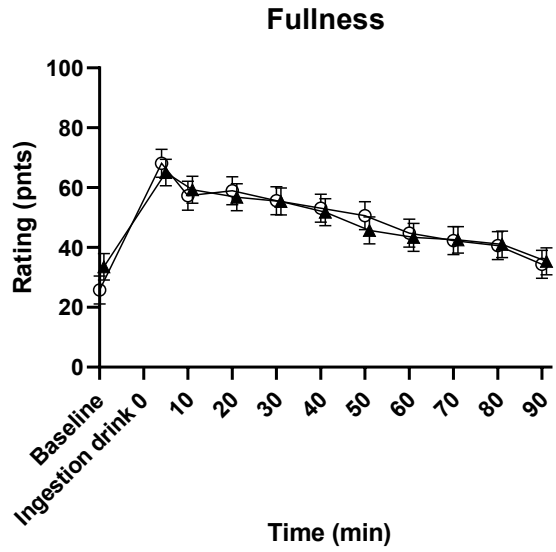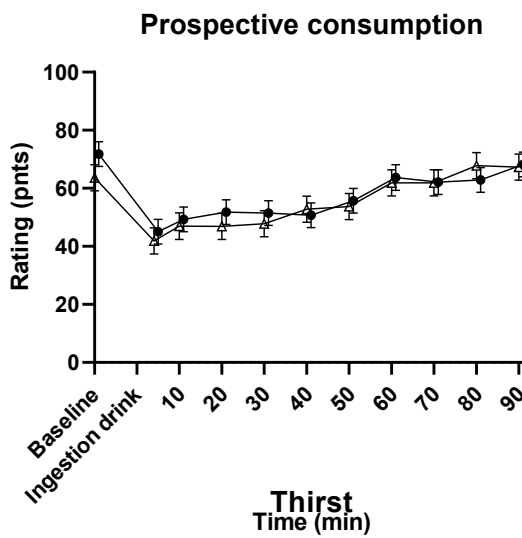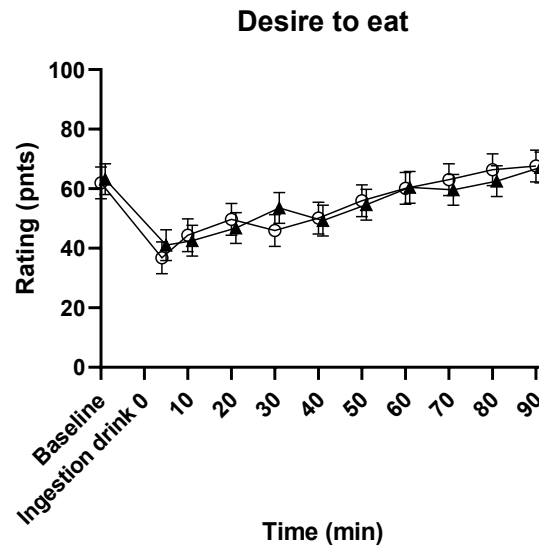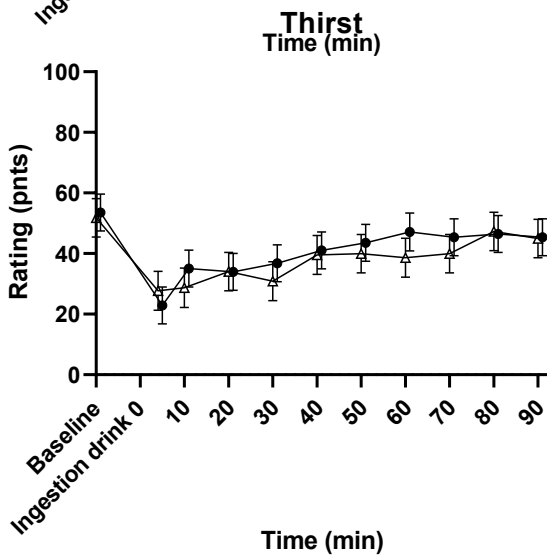

**Supplementary figure 9.** Mean  $\pm$  SEM of appetite ratings hunger, fullness, prospective consumption, desire to eat and thirst (n=15).
